# Supplementary material
Source: MDPI journal article supplement (https://www.mdpi.com/2313-0105/9/6/330)
Supplement: s1 [file s1]

# Low-Temperature-Aged Synthesis of CeO<sub>2</sub>-Coated Li-Rich Oxide as Cathode for Low-Cost High-Energy Density Li-Ion Batteries

Yanlin Liu <sup>1,3,4</sup>, Bin Li <sup>2</sup>, Min Chen <sup>2,3</sup> and Weishan Li <sup>2,3,\*</sup>

<sup>1</sup> School of Automobile and Transportation Engineering, Guangdong Polytechnic Normal University, Guangzhou 510450, China; liuyanlin@gpnu.edu.cn (Y.L.)

<sup>2</sup> School of Chemistry, South China Normal University, Guangzhou 510006, China; lib120@163.com (B.L.); chenmin@m.scnu.edu.cn (M.C.)

<sup>3</sup> National and Local Joint Engineering Research Center of MPES in High Energy and Safety LIBs, Engineering Research Center of MTEES (Ministry of Education), Key Laboratory of ETESPG (GHEI), South China Normal University, Guangzhou 510006, China

<sup>4</sup> School of Material and Energy, Guangdong University of Technology, Guangzhou 510006, China

\* Correspondence: liwsh@scnu.edu.cn; Tel.: +86-02039310256

## Figures and Tables:

Figure S1. TEM image (A) and corresponding EDS elemental mapping of Ce (B), TEM image (C) and selected area electron diffraction (SAED) of CeO<sub>2</sub> (D) for CeO<sub>2</sub> coated Li<sub>1.2</sub>Ni<sub>0.2</sub>Mn<sub>0.6</sub>O<sub>2</sub> without the low-temperature-aged coating process.

Figure S2. XPS of the cycled LMN-P and LMN-C electrode.

Table S1. EDS of lithium electrodes from the cycled cells with LMN-P and LMN-C.

Table S2. ICP analysis for Mn and Ni of the lithium electrodes from the cycled cells with LMN-P and LMN-C.

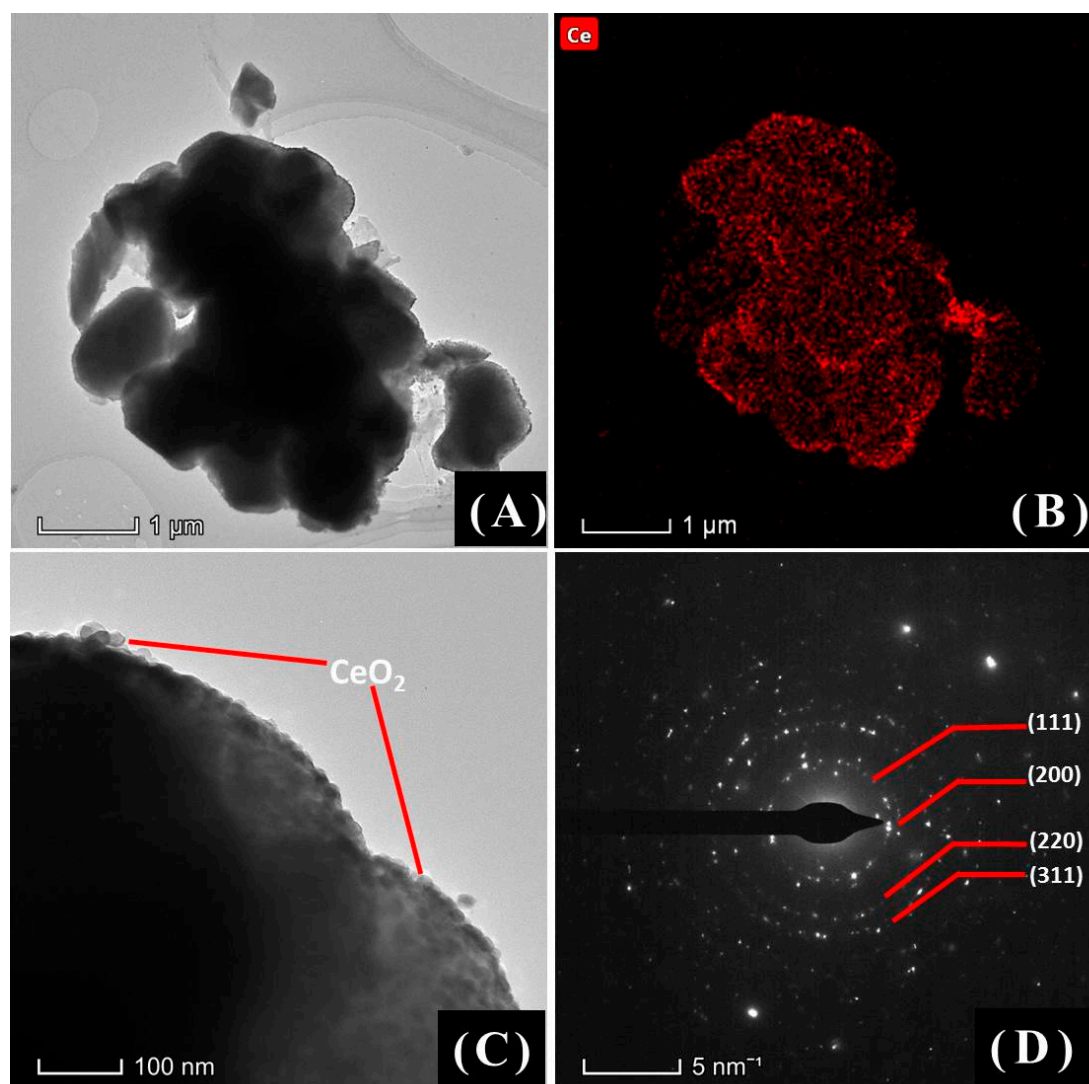

**Figure S1.** TEM image (A) and corresponding EDS Ce mapping of (B), TEM image (C) and selected area electron diffraction (SAED) of CeO<sub>2</sub> (D) for CeO<sub>2</sub> coated Li<sub>1.2</sub>Ni<sub>0.2</sub>Mn<sub>0.6</sub>O<sub>2</sub> without the low-temperature-aged coating process.

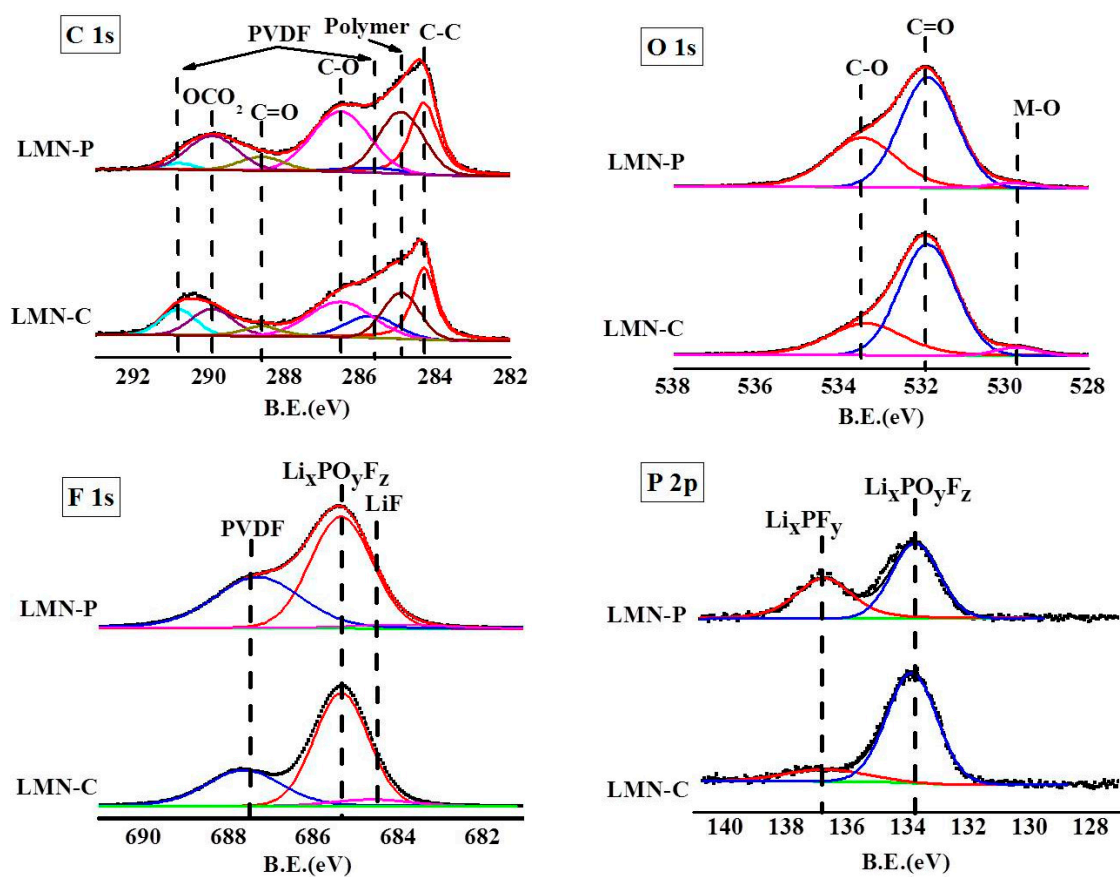

Figure S2. XPS patterns of the cycled LMN-P and LMN-C electrode.

**Table S1.** EDS element contents on the lithium electrodes from the cycled cells with LMN-P and LMN-C.

|              |                 | <b>C</b><br><b>(%)</b> | <b>O</b><br><b>(%)</b> | <b>F</b><br><b>(%)</b> | <b>P</b><br><b>(%)</b> | <b>Mn</b><br><b>(%)</b> | <b>Sum</b><br><b>(%)</b> |
|--------------|-----------------|------------------------|------------------------|------------------------|------------------------|-------------------------|--------------------------|
| <b>LMN-P</b> | <b>Sample 1</b> | 21.88                  | 45.26                  | 25.20                  | 6.53                   | 1.13                    | 100.00                   |
|              | <b>Sample 2</b> | 21.93                  | 44.01                  | 26.02                  | 6.92                   | 1.12                    | 100.00                   |
|              | <b>Sample 3</b> | 21.89                  | 44.62                  | 25.69                  | 6.67                   | 1.13                    | 100.00                   |
|              | <b>Average</b>  | 21.90                  | 44.63                  | 25.64                  | 6.71                   | 1.13                    | 100.00                   |
| <b>LMN-C</b> | <b>Sample 1</b> | 11.38                  | 38.94                  | 45.59                  | 3.89                   | 0.20                    | 100.00                   |
|              | <b>Sample 2</b> | 13.06                  | 42.82                  | 39.94                  | 3.86                   | 0.32                    | 100.00                   |
|              | <b>Sample 3</b> | 11.51                  | 43.48                  | 40.64                  | 3.99                   | 0.38                    | 100.00                   |
|              | <b>Average</b>  | 11.98                  | 41.75                  | 42.06                  | 3.91                   | 0.30                    | 100.00                   |

**Table S2.** ICP element contents on the lithium electrodes from the cycled cells with LMN-P and LMN-C.

|                     | % Mn Detected on Li | % Ni Detected on Li |
|---------------------|---------------------|---------------------|
| Li anode from LMN-P | 3.87                | 1.93                |
| Li anode from LMN-C | 0.65                | 0.14                |
| Fresh Li            | 0.00                | 0.00                |
